# Supplementary material for: Facile fabrication of highly conductive tracks using long silver nanowires and graphene composite
Source: Royal Society of Chemistry journal article supplement (doi:10.1039/c8ra02726a), 2018-01-01
Supplement: c8ra02726a1.pdf [file c8ra02726a1.pdf]

## **Facile fabrication of highly conductive tracks using long silver nanowires and graphene composite**

Su Ding<sup>a,\*</sup>, Luxi Zhang<sup>a</sup>, Weitao Su<sup>a,\*</sup>, Xiwei Huang<sup>b</sup>

<sup>a</sup>College of Materials and Environmental Engineering, Hangzhou Dianzi University, 310018 Hangzhou, P.R. China

<sup>b</sup>Key laboratory of RF Circuit and Systems (Hangzhou Dianzi University), Ministry of Education, 310018 Hangzhou, China

Corresponding author: [dingsu@hdu.edu.cn](mailto:dingsu@hdu.edu.cn); [suweitao@hdu.edu.cn](mailto:suweitao@hdu.edu.cn)

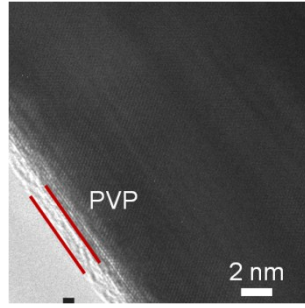

Figure S1 TEM image of individual AgNW with PVP layer on the surface.

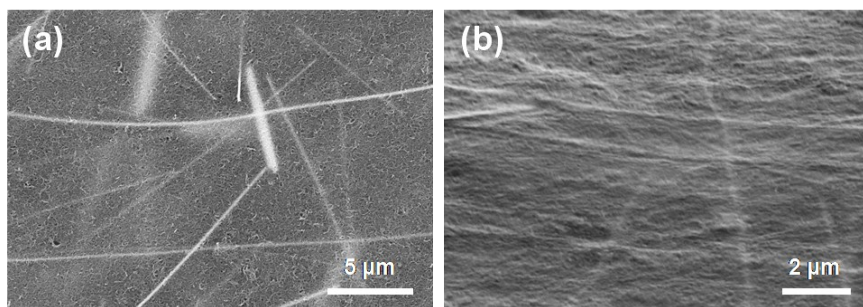

Figure S2 (a) Top view and (b) tilted SEM images of AgNW-G hybrid tracks

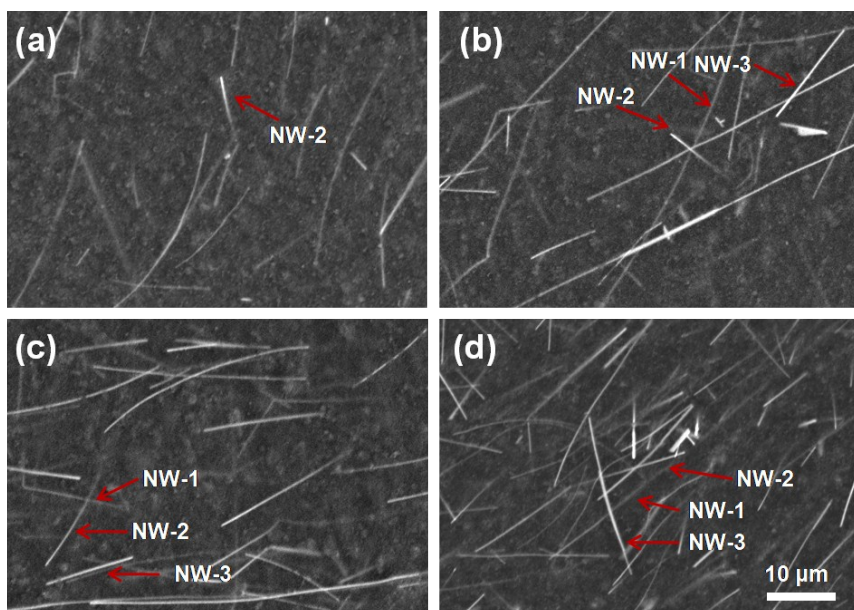

Figure S3 SEM images of AgNW-G hybrid tracks with various Ag containments after sintering at 150°C for 15 min. (a) 5%, (b) 10%, (c) 15%, (d) 30%.

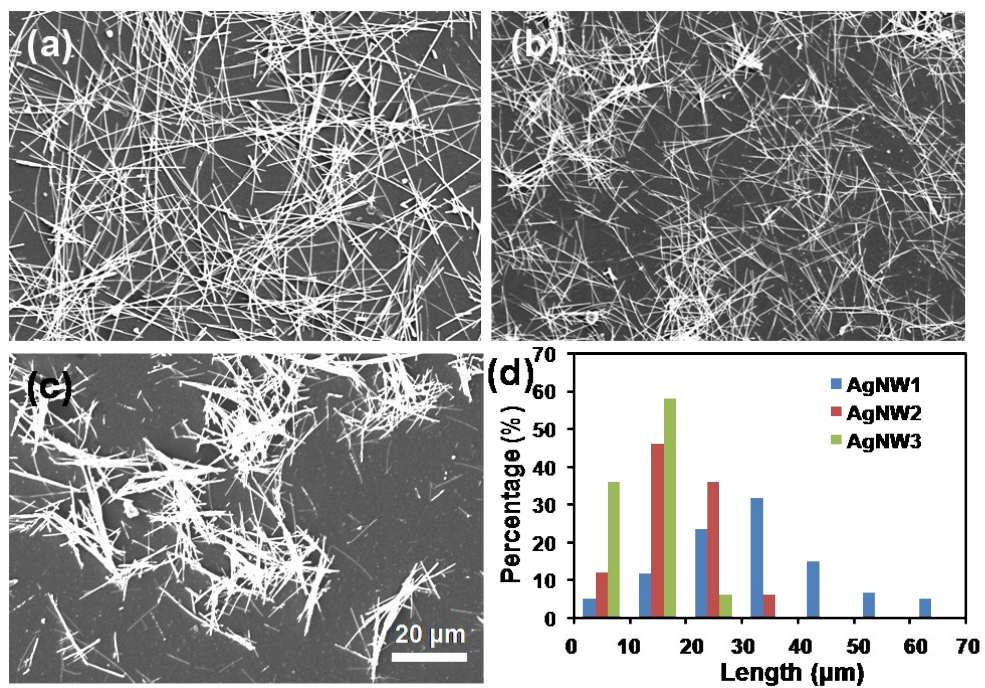

Figure S4 SEM images of AgNW1, AgNW2 and AgNW3

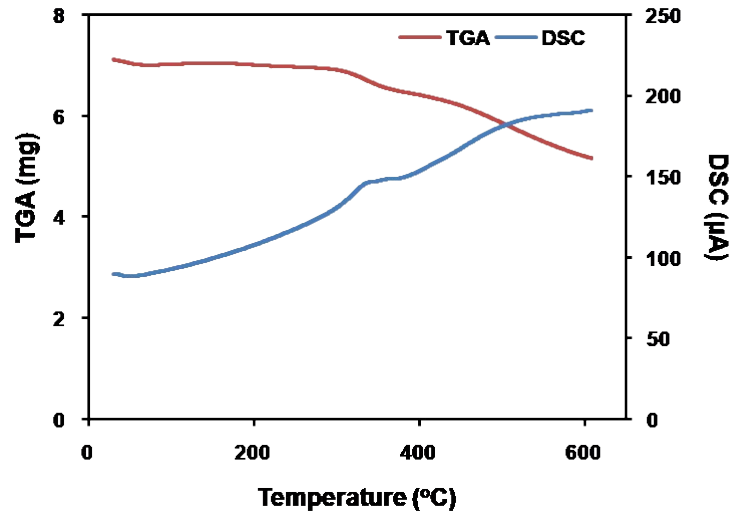

Figure S5 TGA/DSC curves of graphene ink after pre-dried at 60°C.

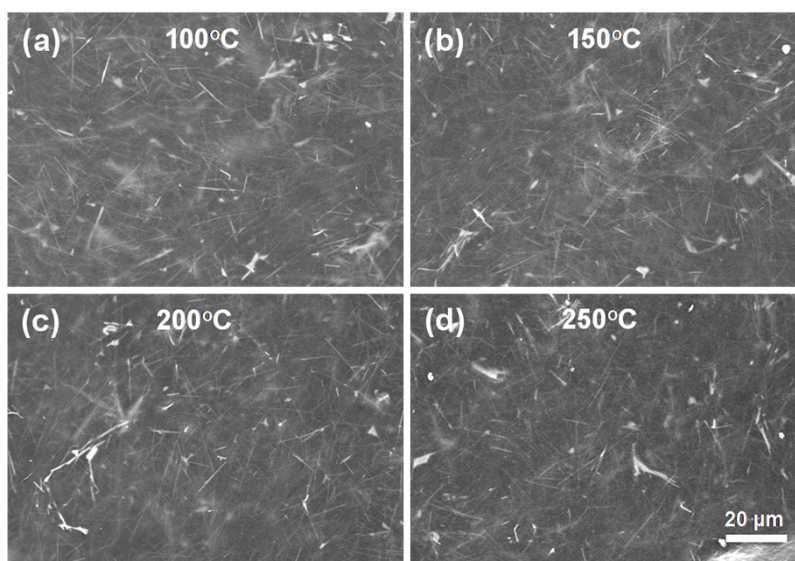

Figure S6 SEM images of AgNW-G hybrid conductive tracks sintered at different temperatures. (a) 100°C, (b) 150°C, (c) 200°C, (d) 250°C
